# Supplementary material for: The effect of new business creation on employment growth in regions facing population decline
Source: Springer Nature journal article supplement (doi:10.1007/s00168-015-0738-1), 2016-01-01
Supplement: MOESM1 [file 7095256]

| Dependent variable: Employment change | Chi-sq | Prob, |
| --- | --- | --- |
| Start-up rate | 96,77 | 0,00 |
| if decline | 13,94 | 0,12 |
| if stable | 21,39 | 0,01 |
| if growth | 83,53 | 0,00 |
|  |  |  |
| Dependent variable: Start-up rate | Chi-sq | Prob. |
| Employment change | 16,75 | 0,05 |
| if decline | 7,26 | 0,61 |
| if stable | 9,12 | 0,43 |
| if growth | 14,12 | 0,12 |
| A1. Vector Autoregression model: Granger Causality/Block Exogeneity Wald Tests | | |
