# Supplementary material for: The effect of new business creation on employment growth in regions facing population decline
Source: Springer Nature journal article supplement (doi:10.1007/s00168-015-0738-1), 2016-01-01
Supplement: MOESM2 [file 7095256]

|  | **Decline** | (< -1%) | **Stable** | (-1> <1%) | **Growth** | (>1%) |  |
| --- | --- | --- | --- | --- | --- | --- | --- |
| **Rural** | 28,30% |  | 22,60% |  | 27,00% |  |  |
|  |  | 15,30% |  | 12,60% |  | 72,10% | 100,00% |
| **Intermediate** | 51,70% |  | 64,50% |  | 54,10% |  |  |
|  |  | 13,40% |  | 17,30% |  | 69,30% | 100,00% |
| **Urban** | 20,00% |  | 12,90% |  | 18,90% |  |  |
|  |  | 15,80% |  | 10,50% |  | 73,70% | 100,00% |
|  | 100,00% |  | 100,00% |  | 100,00% |  |  |

A2. Cross tabulation revealing overlap in types of regions.
